# Supplementary material for: A cytosolic NAD+-dependent GPDH from maize (ZmGPDH1) is involved in conferring salt and osmotic stress tolerance
Source: PubMed Central journal article supplement (PMC6327487; doi:10.1186/s12870-018-1597-6), 2019-01-09
Supplement: 12870_2018_1597_MOESM6_ESM.pdf [file 12870_2018_1597_MOESM6_ESM.pdf]

**Table S1. The gene ID and primers used in this study.**

| Primer Name       | Sequence (5'-3')                                                                  | Gene ID                 | Description           |
|-------------------|-----------------------------------------------------------------------------------|-------------------------|-----------------------|
| <i>AtGPDHc2</i>   | LP-GAGATGGCTGTGAGCAATCTC<br>RP-ACCTCCTCAACAATTCTTCCC<br>LB-GCGTGGACCGCTTGCTGCAACT | TAIR:AT3G07690          | Mutant identification |
| <i>ZmGPDH1</i>    | Forward: ATGGTTGGGAGCGTGCACGTC<br>Reverse: TCATGGTTTTCCAAGGAGAGACG                | GeneBank:MH460963       | cloning               |
| <i>ProZmGPDH1</i> | Forward: CAAT CGGCCGTCAGCATT<br>Reverse: TTCCCGAGCTCAGGAGTCAG                     | GeneBank:MH483980       | cloning               |
| <i>AtGPDHc2</i>   | Forward: GAGTTTGAGCCTCATCCTC<br>Reverse: CATTAGGTGGTCGGTGAGGT                     | TAIR:AT3G07690          | RT-PCR                |
| <i>ZmGPDH1</i>    | Forward: AAGGGAGAGTTGAGTCCTG<br>Reverse: AGTATTCTGT AAAGCCTC                      | GeneBank:MH460963       | qRT-PCR               |
| <i>GUS</i>        | Forward: GTCGCGCAAGACTGTAACCA<br>Reverse: TGGTTAATCAGGAAGTGTG                     | GeneBank:KM434773       | qRT-PCR               |
| <i>GSTF14</i>     | Forward: ATCTGGGGTAATTCGGCAGC<br>Reverse: TTTTGGCTTCACCAGCAAGC                    | TAIR:AT1G49860          | qRT-PCR               |
| <i>MDAR3</i>      | Forward: ACAAAGAGAAAGAGATAGTCAAAGC<br>Reverse: TGCTTCTTGGACGCCAATTC               | TAIR:AT3G09940          | qRT-PCR               |
| <i>CSD1</i>       | Forward: TGAACTCAGCCTGGCTACTGG<br>Reverse: AGCCACACACCAGAAGATACACAC               | TAIR:AT1G08830          | qRT-PCR               |
| <i>CAT1</i>       | Forward: TGGGATTCAGACAGGCAAGAACG<br>Reverse: GTTTGGCCTCACGTTAAGACGAGT             | TAIR:AT1G20630          | qRT-PCR               |
| <i>APX1</i>       | Forward: TTTCCACCCTGGAAGAGAGGAC<br>Reverse: TCACAACCCTTGGTAGCATCAGG               | TAIR:AT1G07890          | qRT-PCR               |
| <i>GRI</i>        | Forward: ATTCGTGGCAGATGTCGT<br>Reverse: CACAGCTCCAGCCTGATC                        | TAIR:AT3G24170          | qRT-PCR               |
| <i>DHAR1</i>      | Forward: TGGCTCTGGAAATCTGTG<br>Reverse: AGCAAGGCATGTTTCAGATCC                     | TAIR:AT3G24170          | qRT-PCR               |
| <i>DHAR2</i>      | Forward: AATGGGTGGCTGATTCTGAC<br>Reverse: CCGCAACCACAATCTCTTTC                    | TAIR:AT1G75270          | qRT-PCR               |
| <i>GalDH</i>      | Forward: AGTCGCCGAAGATGATGCCGT<br>Reverse: GACAATATCACATCGACAGT                   | TAIR:AT4G33670          | qRT-PCR               |
| <i>ACTIN2</i>     | Forward: GCTGACCGTATGAGCAAAGA<br>Reverse: GATCCACATCTGTTGGAACG                    | TAIR:AT3G18780          | qRT-PCR               |
| <i>UBQ10</i>      | Forward: GGCCTTGTATAATCCCTGATGAA<br>Reverse: AGAAGTCGACTTGTATTAGAAAGAAA           | TAIR:AT4G05320          | qRT-PCR               |
| <i>ZmGAPDH</i>    | Forward: CCCTTCATCACCACGGACTAC<br>Reverse: AACCTTCTTGGCACCACCCT                   | GeneBank:XM_020551757.1 | qRT-PCR               |
| <i>ZmACTIN</i>    | Forward: ATCCAGGCTGTTCTTTCGTT<br>Reverse: CATTAGGTGGTCGGTGAGGT                    | GeneBank:XM_008656735.2 | qRT-PCR               |
